# Supplementary material for: Functional Roles of Homologous Recombination and Non-Homologous End Joining in DNA Damage Response and Microevolution in Cryptococcus neoformans
Source: MDPI journal article supplement (doi:10.3390/jof7070566), 2021-07-16
Supplement: s1 [file s1]

Supplementary Table S3. Mutation profiles in the 5-FOA-resistant strains

| <i>rad51Δ</i> +RAD51 |                                                                   |                   |                           |                   | <i>rad51Δ</i> |                           |                        |                           |                   |
|----------------------|-------------------------------------------------------------------|-------------------|---------------------------|-------------------|---------------|---------------------------|------------------------|---------------------------|-------------------|
|                      | <i>URA3</i>                                                       |                   | <i>URA5</i>               |                   |               | <i>URA3</i>               |                        | <i>URA5</i>               |                   |
| clone                | DNA mutation <sup>1</sup>                                         | Protein mutation  | DNA mutation <sup>1</sup> | Protein mutation  | clone         | DNA mutation <sup>1</sup> | Protein mutation       | DNA mutation <sup>1</sup> | Protein mutation  |
| #1                   | 'ATGGA' insertion                                                 | Stop codon change | None                      | None              | #1            | 'TACGCCTCGC GC' deletion  | 'YASR(10-13)' deletion | None                      | None              |
| #2                   | 'GT-AG rule' sequence (G->A) in the 2 <sup>nd</sup> intron region | ND*               | None                      | None              | #2            | 'TACGCCTCGC GC' deletion  | 'YASR(10-13)' deletion | None                      | None              |
| #3                   | 'GT-AG rule' sequence (G->A) in the 2 <sup>nd</sup> intron region | ND*               | None                      | None              | #3            | 'TACGCCTCGC GC' deletion  | 'YASR(10-13)' deletion | None                      | None              |
| #4                   | None                                                              | None              | G546C                     | E182D             | #4            | None                      | None                   | G124C                     | A42P              |
| #5                   | 'GT-AG rule' sequence (G->A) in the 2 <sup>nd</sup> intron region | ND*               | None                      | None              | #5            | 'TACGCCTCGC GC' deletion  | 'YASR(10-13)' deletion | None                      | None              |
| #6                   | None                                                              | None              | G546C                     | E182D             | #6            | None                      | None                   | C155A                     | Stop codon change |
| #7                   | None                                                              | None              | C660A                     | Stop codon change | #7            | None                      | None                   | G493A                     | E165K             |
| #8                   | 'GT-AG rule' sequence (G->A) in the 2 <sup>nd</sup> intron region | ND*               | None                      | None              | #8            | None                      | None                   | G484A                     | D162N             |
| #9                   | 'GT-AG rule' sequence (G->A) in the 2 <sup>nd</sup> intron region | ND*               | None                      | None              | #9            | None                      | None                   | C155A                     | Stop codon change |
| #10                  | 'GT-AG rule' sequence (G->A) in the                               | ND*               | None                      | None              | #10           | 'TACGCCTCGC GC' deletion  | 'YASR(10-13)' deletion | None                      | None              |

|     |                                                                   |                 |      |      |     |                          |                        |       |       |
|-----|-------------------------------------------------------------------|-----------------|------|------|-----|--------------------------|------------------------|-------|-------|
|     | 2 <sup>nd</sup> intron region                                     |                 |      |      |     |                          |                        |       |       |
| #11 | 'GT-AG rule' sequence (G->A) in the 2 <sup>nd</sup> intron region | ND <sup>2</sup> | None | None | #11 | None                     | None                   | T185G | L62R  |
| #12 | 'GT-AG rule' sequence (G->A) in the 2 <sup>nd</sup> intron region | ND <sup>2</sup> | None | None | #12 | None                     | None                   | G315C | R105S |
| #13 | 'GT-AG rule' sequence (G->A) in the 2 <sup>nd</sup> intron region | ND <sup>2</sup> | None | None | #13 | 'TACGCCTCGC GC' deletion | 'YASR(10-13)' deletion | None  | None  |
| #14 | 'GT-AG rule' sequence (G->A) in the 2 <sup>nd</sup> intron region | ND <sup>2</sup> | None | None | #14 | 'TACGCCTCGC GC' deletion | 'YASR(10-13)' deletion | None  | None  |
| #15 | 'GT-AG rule' sequence (G->A) in the 2 <sup>nd</sup> intron region | ND <sup>2</sup> | None | None | #15 | 'TACGCCTCGC GC' deletion | 'YASR(10-13)' deletion | None  | None  |

DNA mutation<sup>1</sup>: a position for nucleotide change in the cDNA sequence

ND<sup>2</sup>: Not determined
