# Supplementary material for: Functional Roles of Homologous Recombination and Non-Homologous End Joining in DNA Damage Response and Microevolution in Cryptococcus neoformans
Source: MDPI journal article supplement (doi:10.3390/jof7070566), 2021-07-16
Supplement: s1 [file s1]

Table S2. Primers used in this study

| Primer Name | Sequence (5'–3')                                     | Comment                                                         |
|-------------|------------------------------------------------------|-----------------------------------------------------------------|
| B79         | TGTGGATGCTGGCGGAGGATA                                | Screening primer on <i>ACT1</i> promoter                        |
| B1026       | GTAAACGACGGCCAGTGAGC                                 | M13 forward (extended)                                          |
| B1027       | CAGGAAACAGCTATGACCATG                                | M13 reverse (extended)                                          |
| B1454       | AAGGTGTTCCCGACGACGAATCG                              | NSL2                                                            |
| B1455       | AACTCCGTCGCGAGCCCCATCAAC                             | NSR2                                                            |
| B1886       | TGGAAGAGATGGATGTGC                                   | NSL-NEO                                                         |
| B1887       | ATTGTCTGTTGTGCCAG                                    | NSR-NEO                                                         |
| B679        | CGCCCTTGCTCCTTCTTCTATG                               | <i>ACT1</i> qRT primer 1                                        |
| B680        | GACTCGTCGTATTCGCTCTTCG                               | <i>ACT1</i> qRT primer 2                                        |
| J1          | TGGTGGTGAGGGAAAAATG                                  | <i>RAD51</i> (CNAG_00720) qRT primer 1                          |
| J2          | GCACCTCTTACCATCAAG                                   | <i>RAD51</i> (CNAG_00720) qRT primer 2                          |
| J1321       | GCCACCAACGAGCAAATAG                                  | <i>KU70</i> (CNAG_04220) qRT primer 1                           |
| J1322       | ATGCCAAGGAGGATTAGG                                   | <i>KU70</i> (CNAG_04220) qRT primer 2                           |
| J1323       | CGGAAGACGCAGAAGGAAG                                  | <i>KU80</i> (CNAG_03637) qRT primer 1                           |
| J1324       | AGGTTCGGTCTTCGTGATG                                  | <i>KU80</i> (CNAG_03637) qRT primer 2                           |
| J1207       | TATCACATCCTGAGCCACG                                  | <i>KU70</i> (CNAG_04220) –5' screening primer for deletion      |
| J1208       | AGGGCCAAAGTGCTTTCTG                                  | <i>KU70</i> (CNAG_04220) – left flanking primer 1 for deletion  |
| J1209       | TCACTGGCCGTCGTTTTACTTGCATGAGTCAACGGAC<br>G           | <i>KU70</i> (CNAG_04220) – left flanking primer 2 for deletion  |
| J1210       | CATGGTCATAGCTGTTTCTGAAACCATACGGCAGCC<br>ATC          | <i>KU70</i> (CNAG_04220) – right flanking primer 1 for deletion |
| J1211       | GAATGGAGGTCGGGTGAAC                                  | <i>KU70</i> (CNAG_04220) – right flanking primer 2 for deletion |
| J1212       | TTTCCTCTGGCTCCTGAAC                                  | <i>KU70</i> (CNAG_04220) – probe primer for Southern blot       |
| J1348       | GGTACCg <sub>ggccgc</sub> AGAAGTATGTCGCGGAATGG       | <i>KU70</i> (CNAG_04220) – complementation primer L1            |
| J1349       | CGTAAATGAGAAGCAGCTTGG                                | <i>KU70</i> (CNAG_04220) – complementation primer R1            |
| J1350       | TGGTGGTGGTATGGACATTG                                 | <i>KU70</i> (CNAG_04220) – complementation seq 1                |
| J1351       | CAGTCGAAACAACCGAACC                                  | <i>KU70</i> (CNAG_04220) – complementation seq 2                |
| J1352       | CAGGAGCCAGAGGAAAGAG                                  | <i>KU70</i> (CNAG_04220) – complementation primer L2            |
| J1353       | g <sub>cgccgc</sub> TCTCCGTTGGTTTATTCCTC             | <i>KU70</i> (CNAG_04220) – complementation primer R2            |
| J1354       | GCCGACGAAGAGGACAAAG                                  | <i>KU70</i> (CNAG_04220) – complementation seq 3                |
| J1213       | AACGGACATCCAAGCCTC                                   | <i>KU80</i> (CNAG_03637) –5' screening primer for deletion      |
| J1214       | AGCCTCGCCAAAGAGTATG                                  | <i>KU80</i> (CNAG_03637) – left flanking primer 1 for deletion  |
| J1215       | TCACTGGCCGTCGTTTTACCGCCAACATTCAATGAG<br>C            | <i>KU80</i> (CNAG_03637) – left flanking primer 2 for deletion  |
| J1216       | CATGGTCATAGCTGTTTCTGTTGCCGAAGACGAACG<br>CAC          | <i>KU80</i> (CNAG_03637) – right flanking primer 1 for deletion |
| J1217       | TCGTATCCAAGGGCGGTAG                                  | <i>KU80</i> (CNAG_03637) – right flanking primer 2 for deletion |
| J1218       | AATGCCCTTACGAGTGTC                                   | <i>KU80</i> (CNAG_03637) – probe primer for Southern blot       |
| J1342       | CATATG <sub>ggccgc</sub> TGGAAGGCTTCGTACAGG          | <i>KU80</i> (CNAG_03637) – complementation primer L1            |
| J1343       | CATATGAATGATGCTGTTT                                  | <i>KU80</i> (CNAG_03637) – complementation primer R1            |
| J1344       | ATGATAGGGTACGAGTGC                                   | <i>KU80</i> (CNAG_03637) – complementation primer seq1          |
| J1345       | GGGATGATCTCGGCTGAAG                                  | <i>KU80</i> (CNAG_03637) – complementation primer L2            |
| J1346       | g <sub>cgccgc</sub> AGAAAGTACCTTGGCTGCTC             | <i>KU80</i> (CNAG_03637) – complementation primer R2            |
| J1347       | TCCCCATCACTGACCACC                                   | <i>KU80</i> (CNAG_03637) – complementation primer seq2          |
| J1271       | g <sub>cgccgc</sub> GCAGCTTGGAGCAGAGTAC              | <i>RAD51</i> (CNAG_00720)- complementation primer L1            |
| J1272       | AGCGTAATCTGGAACATCGTATGGGTACATTGTTCTT<br>GCGAGGTGTTG | <i>RAD51</i> (CNAG_00720)- complementation primer R1            |
| J1273       | TACCCATACGATGTTCAGATTACGCTTCGCGAGAGC<br>AGGAGCATGAC  | <i>RAD51</i> (CNAG_00720)- complementation primer L2            |
| J1274       | GGTACCATTACATGCTAG                                   | <i>RAD51</i> (CNAG_00720)- complementation primer R2            |
| J1275       | GGTACCTATGGGATTACGA                                  | <i>RAD51</i> (CNAG_00720)- complementation primer L3            |
| J1276       | GGTACCTATGGGATTACGA                                  | <i>RAD51</i> (CNAG_00720)- complementation primer R3            |
| J1567       | AGAGCATCGGATAGGCGTG                                  | <i>URA5</i> (CNAG_03196) amplification primer L1                |
| J1568       | CCAGCCCTATTTCACAGAC                                  | <i>URA5</i> (CNAG_03196) amplification primer R1                |
| J1149       | TGCACGTCACGCATCATC                                   | <i>URA5</i> (CNAG_03196) sequencing primer 1                    |
| J1150       | CCATTAGGTCCAGGTGCTC                                  | <i>URA5</i> (CNAG_03196) sequencing primer 2                    |
| J1623       | TGCCATACCATCTCCATACG                                 | <i>URA3</i> (CNAG_04961) amplification primer L1                |

|       |                     |                                                  |
|-------|---------------------|--------------------------------------------------|
| J1624 | GTCACGTTGAATGGCAGC  | <i>URA3</i> (CNAG_04961) amplification primer R1 |
| J1625 | TGATTGACGACGGACGGAC | <i>URA3</i> (CNAG_04961) sequencing primer 1     |
| J1626 | CAATTGGTGGCGGAGGAG  | <i>URA3</i> (CNAG_04961) sequencing primer 2     |
