# Supplementary material for: Functional Roles of Homologous Recombination and Non-Homologous End Joining in DNA Damage Response and Microevolution in Cryptococcus neoformans
Source: MDPI journal article supplement (doi:10.3390/jof7070566), 2021-07-16
Supplement: s1 [file s1]

Table S1. Strains used in this study

| Strain  | Genotype                                                                         | Parent | Reference  |
|---------|----------------------------------------------------------------------------------|--------|------------|
| H99     | <i>MAT<math>\alpha</math></i>                                                    |        | [1]        |
| KW137   | <i>MAT<math>\alpha</math> CNAG_02589 (BDR1)::NAT #230</i>                        | H99    | [2]        |
| YSB3785 | <i>MAT<math>\alpha</math> CNAG_05216 (RAD53)::NAT#184</i>                        | H99    | [3]        |
| KW1213  | <i>MAT<math>\alpha</math> CNAG_00720::NAT#43 (RAD51)</i>                         | H99    | [2]        |
| KW1239  | <i>MAT<math>\alpha</math> CNAG_00720 (RAD51)::NAT# pHYG-RAD51-N-HA</i>           | KW1213 | This study |
| KW1038  | <i>MAT<math>\alpha</math> CNAG_04220::NAT#43 (KU70)</i>                          | H99    | This study |
| KW1039  | <i>MAT<math>\alpha</math> CNAG_04220::NAT#43 (KU70)</i>                          | H99    | This study |
| KW1040  | <i>MAT<math>\alpha</math> CNAG_04220::NAT#43 (KU70)</i>                          | H99    | This study |
| KW1276  | <i>MAT<math>\alpha</math> CNAG_04220::NAT#43 (KU70) pHYG-KU70</i>                | KW1038 | This study |
| KW989   | <i>MAT<math>\alpha</math> CNAG_03637::NAT#234 (KU80)</i>                         | H99    | This study |
| KW990   | <i>MAT<math>\alpha</math> CNAG_03637::NAT#234 (KU80)</i>                         | H99    | This study |
| KW991   | <i>MAT<math>\alpha</math> CNAG_03637::NAT#234 (KU80)</i>                         | H99    | This study |
| KW1272  | <i>MAT<math>\alpha</math> CNAG_03637::NAT#234 (KU80) pHYG-KU80</i>               | KW989  | This study |
| KW1258  | <i>MAT<math>\alpha</math> CNAG_04220::NAT#43 (KU70) CNAG_00720::NEO (RAD51)</i>  | KW1038 | This study |
| KW1259  | <i>MAT<math>\alpha</math> CNAG_04220::NAT#43 (KU70) CNAG_00720::NEO (RAD51)</i>  | KW1038 | This study |
| KW1260  | <i>MAT<math>\alpha</math> CNAG_04220::NAT#43 (KU70) CNAG_00720::NEO (RAD51)</i>  | KW1038 | This study |
| KW1249  | <i>MAT<math>\alpha</math> CNAG_03637::NAT#234 (KU80) CNAG_00720::NEO (RAD51)</i> | KW989  | This study |
| KW1250  | <i>MAT<math>\alpha</math> CNAG_03637::NAT#234 (KU80) CNAG_00720::NEO (RAD51)</i> | KW989  | This study |

Each *NAT-STM#* indicates the *Nat<sup>r</sup>* marker with a unique signature tag.

## References

1. Perfect, J.R.; Ketabchi, N.; Cox, G.M.; Ingram, C.W.; Beiser, C.L. Karyotyping of *Cryptococcus neoformans* as an epidemiological tool. *J. Clin. Microbiol.* **1993**, *31*, 3305-3309.
2. Jung, K.W.; Yang, D.H.; Kim, M.K.; Seo, H.S.; Lim, S.; Bahn, Y.S. Unraveling Fungal Radiation Resistance Regulatory Networks through the Genome-Wide Transcriptome and Genetic Analyses of *Cryptococcus neoformans*. *mBio* **2016**, *7*, doi:10.1128/mBio.01483-16.
3. Lee, K.T.; So, Y.S.; Yang, D.H.; Jung, K.W.; Choi, J.; Lee, D.G.; Kwon, H.; Jang, J.; Wang, L.L.; Cha, S., et al. Systematic fungal analysis of kinases in the fungal pathogen *Cryptococcus neoformans*. *Nature communications* **2016**, *7*, 12766, doi:doi: 10.1038/ncomms12766.
