# Supplementary material for: Functional Roles of Homologous Recombination and Non-Homologous End Joining in DNA Damage Response and Microevolution in Cryptococcus neoformans
Source: J Fungi (Basel). 2021 Jul 16;7(7):566. doi: 10.3390/jof7070566 (PMC8307084; doi:10.3390/jof7070566)
Supplement: Supplementary file 1 [file jof-07-00566-s001.zip]

Archive with 7 entries (7 files):
- Fig_S1_Jung et al.pptx
- Fig_S2_Jung et al.pptx
- Fig_S3_Jung et al.pptx
- Fig_S4_Jung et al.pptx
- Table_S1_Jung et al.pdf
- Table_S2_Jung et al.pdf
- Table_S3_Jung et al.pdf
